# Supplementary material for: In situ targeted mutagenesis of gut bacteria
Source: bioRxiv or medRxiv preprint supplement (doi:10.1101/2022.09.30.509847), 2022-09-30
Supplement: Supplementary file [file media-1.pdf]

## Supplementary Information

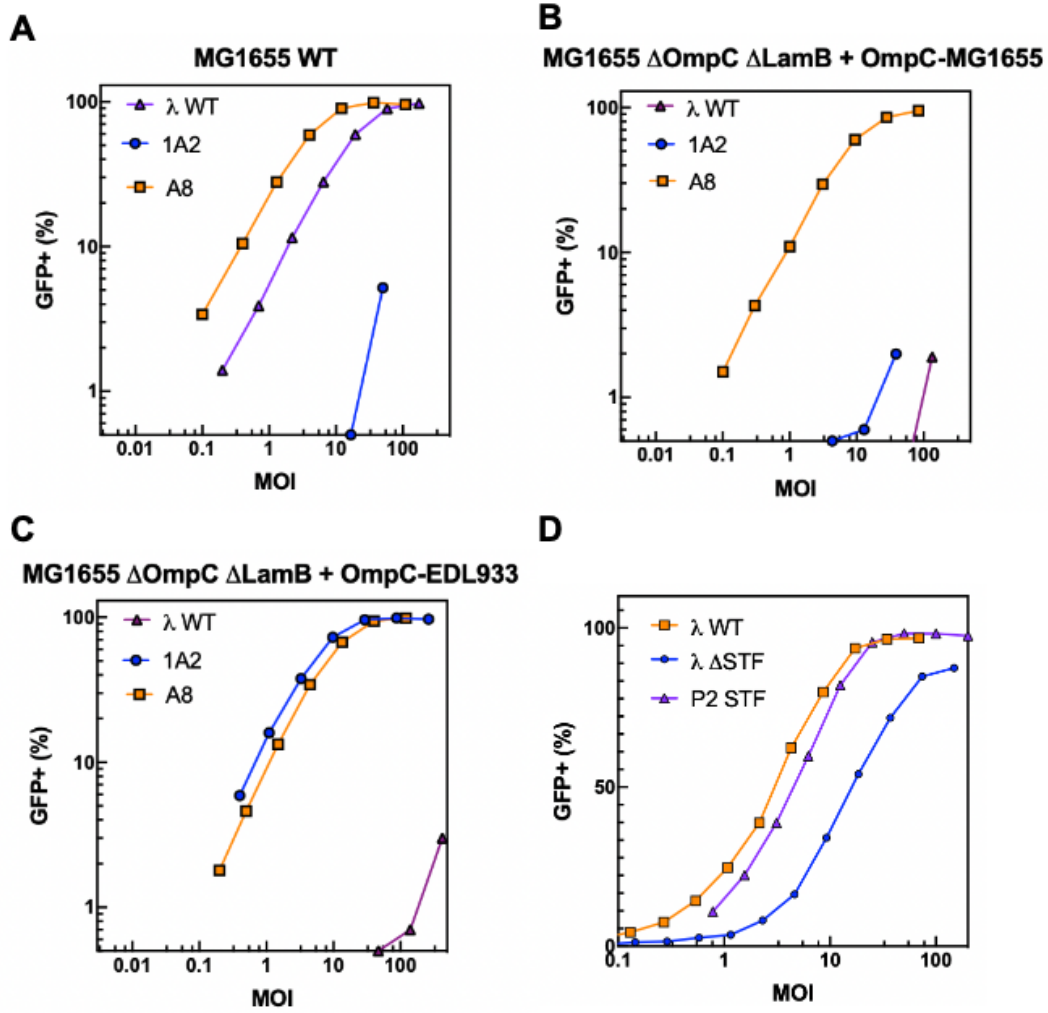

**Figure S1: Cell receptor analysis for efficient cosmid delivery.** Delivery efficiency assays of cosmids harboring Ur- $\lambda$  wild-type (WT) gpJ and stf, or harboring gpJ chimeras and P2 STF. Transduction of a payload encoding a *sfGFP* fluorescent protein gene was measured in a flow cytometer (excitation: 488 nm, emission: 530/30 BP; Attune NxT Thermo Scientific) at different MOIs. **A)** Delivery efficiency into MG1655 WT, carrying the endogenous OmpC variant in the genome. **B)** and **C)** Delivery efficiency into a MG1655 strain deleted for both *lamB* and *ompC* genes, complemented with two different *ompC* variants on a plasmid (p1471 or p1472). **D)** Delivery efficiencies in *E. coli* MG1655 of  $\lambda$  particles carrying the WT  $\lambda$  STF (orange line), no STF (blue line) and  $\lambda$ -P2 STF chimera (p938) (purple line).

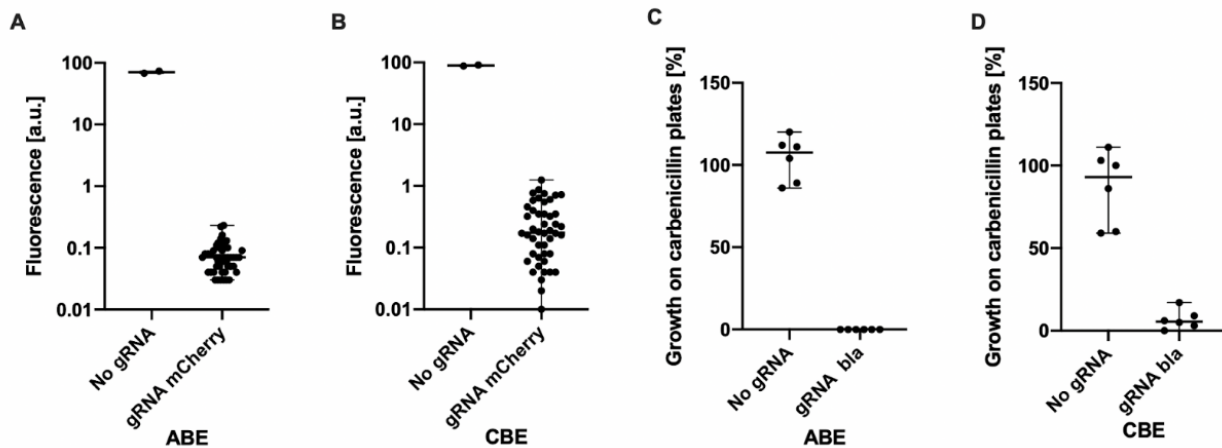

**Figure S2: Targeted base editing of the *E. coli* genome *in vitro* after DNA payload transformation and antibiotic selection. **A)** Adenine base editing (ABE = ABE8e, plasmid p2325) of MG1655-*mCherry*. The experiment was performed in the presence (48 colonies analyzed) or absence (2 colonies analyzed) of a guide RNA targeting the active site of mCherry (tripeptide: M71, Y72, G73). **B)** Cytosine base editing (CBE = evoAPOBEC1-nCas9-UGI, plasmid p2326) of mCherry on MG1655-*mCherry* genome. The experiment was performed in presence (48 colonies analyzed) or absence (2 colonies analyzed) of a guide RNA inserting a stop codon at position Q114\* into mCherry. Fluorescence of individual colonies was measured by flow cytometry (excitation: 561 nm, emission: 620/15 BP; Attune NxT Thermo Scientific). Dots represent single colonies after overnight incubation on chloramphenicol plates. **C)** Adenine base editing of  $\beta$ -lactamase (*bla*) in MG1655-*bla in vitro* (plasmid p1396). The experiment was performed in presence or absence of a guide RNA targeting the active site of  $\beta$ -lactamase (K73E or K73R). **D)** Cytosine base editing of  $\beta$ -lactamase in MG1655-*bla in vitro* (plasmid p2327). The CBE inserts a premature stop codon (Q37\*) into the target gene, resulting in the re-sensitization of the bacterial population to  $\beta$ -lactam carbenicillin. Adenine and cytosine base editing of  $\beta$ -lactamase was analyzed by colony counting after overnight incubation on chloramphenicol (CA) and CA/carbenicillin agar plates at 30°C. The percentage growth was obtained by dividing the number of colonies on CA/carbenicillin plates by the number on CA plates. One dot represents one transformation after overnight incubation on plates.**

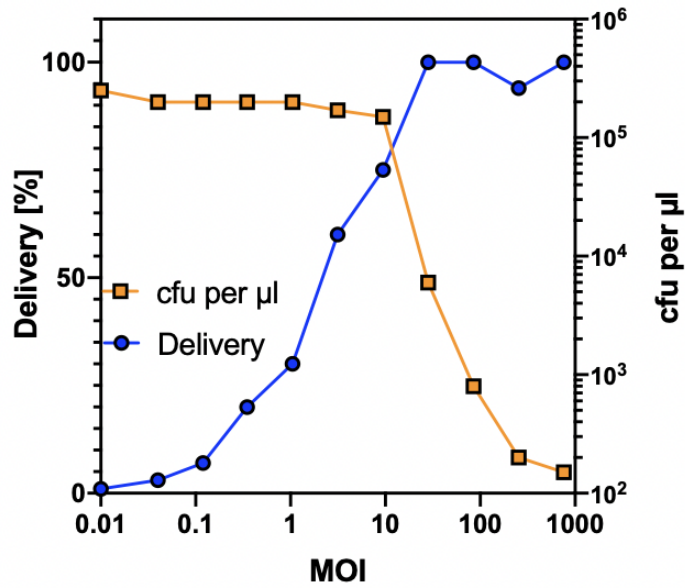

**Figure S3: Multiplicity of injection (MOI)-dependent delivery efficiency and corresponding adenine base editing (ABE).** Delivery efficiency was obtained by colony counting after overnight incubation on LB and LB (chloramphenicol) agar plates. Left y axis: The percentage delivery was obtained by dividing the number of colonies on chloramphenicol plates by the number on LB plates. Right y axis: Base editing of  $\beta$ -lactamase in strain MG1655-*b/a* diminishes cell growth on carbenicillin plates (colony-forming units cfu per  $\mu\text{l}$ ).

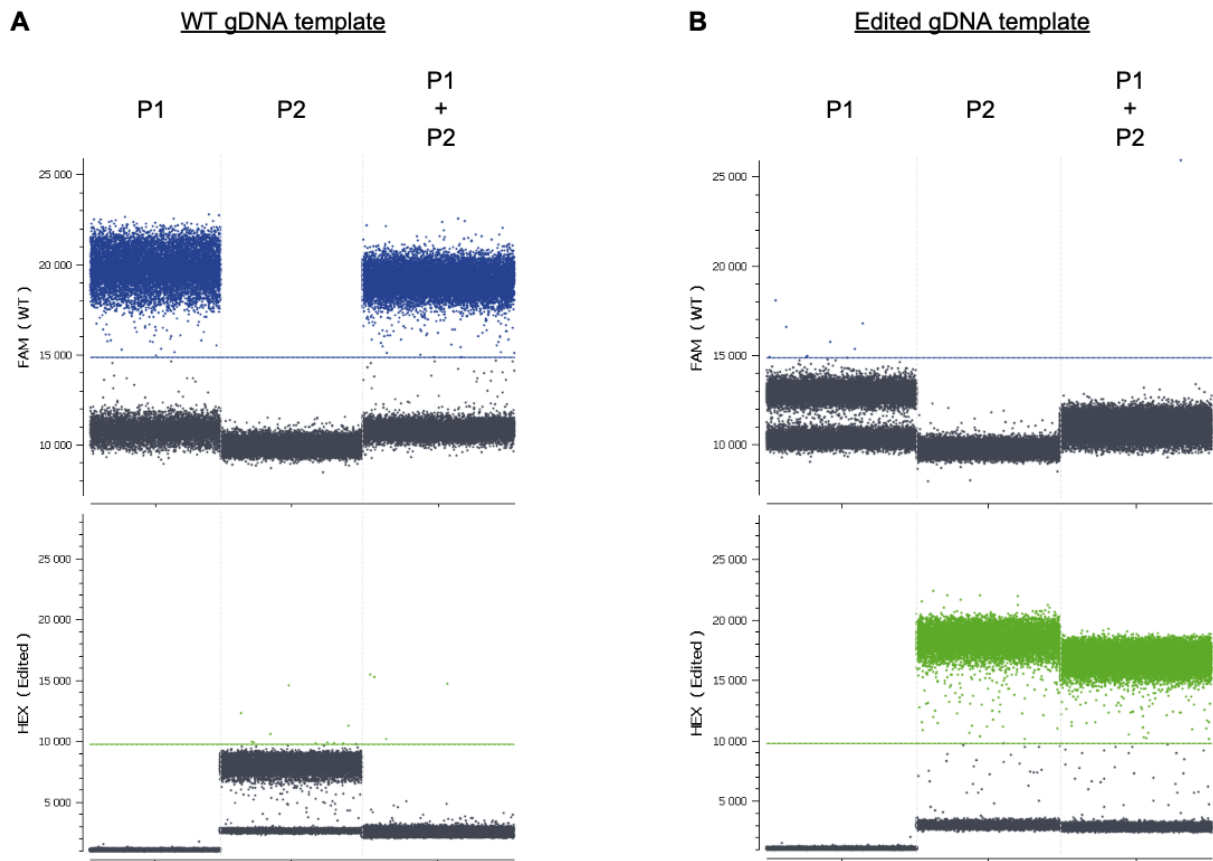

**Figure S4: Validation of ddPCR Taqman assay.** Probes P1 (wild-type WT target) and P2 (base-edited target) were assessed for their specificity, either individually or when mixed together at a 1:1 molar ratio, using purified genomic DNA (gDNA) from wild-type WT (**panel A**) and *in vitro*-edited (**panel B**) MG1655-*bla* as template.

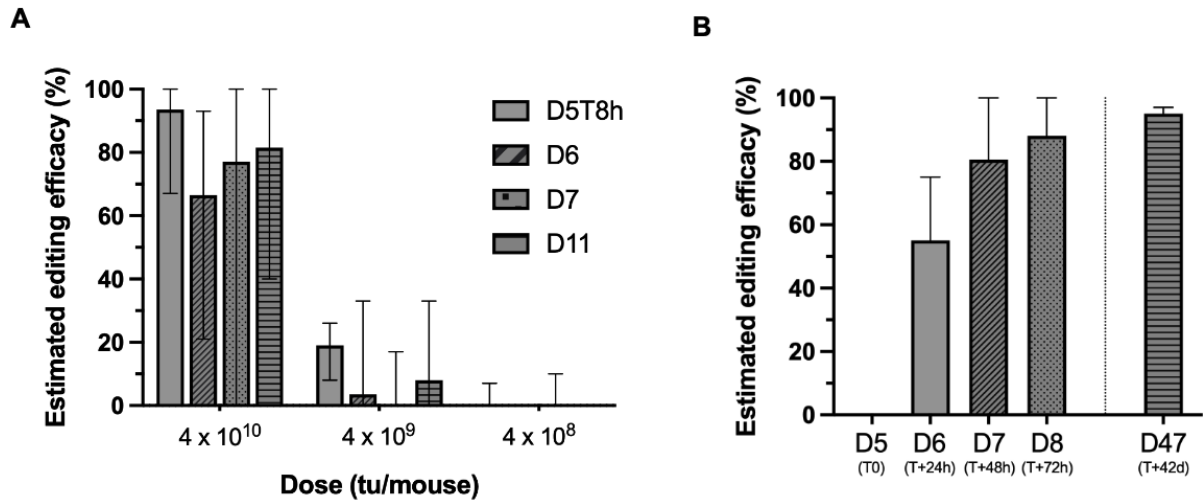

**Figure S5: Estimated efficacy of targeted adenine base editing on the *E. coli* genome in gut of BALB/c mice after cosmid treatment using a non-replicative payload.** Estimation of the editing efficacy as measured by repatching individual colonies onto agar plate with or without carbenicillin, for the initial dose-response experiment (**panel A**), and for the experiment looking at cumulative effects (**panel B**). Bars represent the group median, with 95% confidence interval.

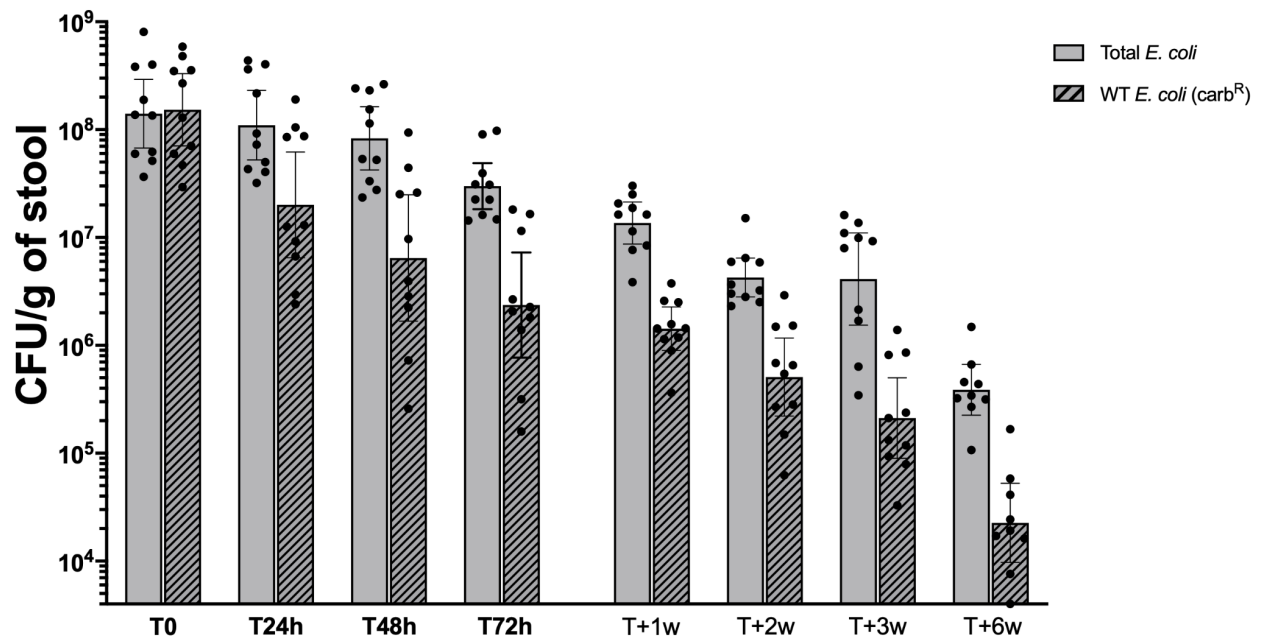

**Figure S6: *E. coli* s21052 colonization levels over time in the streptomycin-treated BALB/c model during treatment with base-editing cosmid particles.** Total *E. coli* bacteria were quantified by plating resuspended stool samples into Drigalski plates supplemented with streptomycin. Wild-type WT (ie, non-edited) *E. coli* s21052 were quantified by plating samples onto Drigalski plates with carbenicillin.

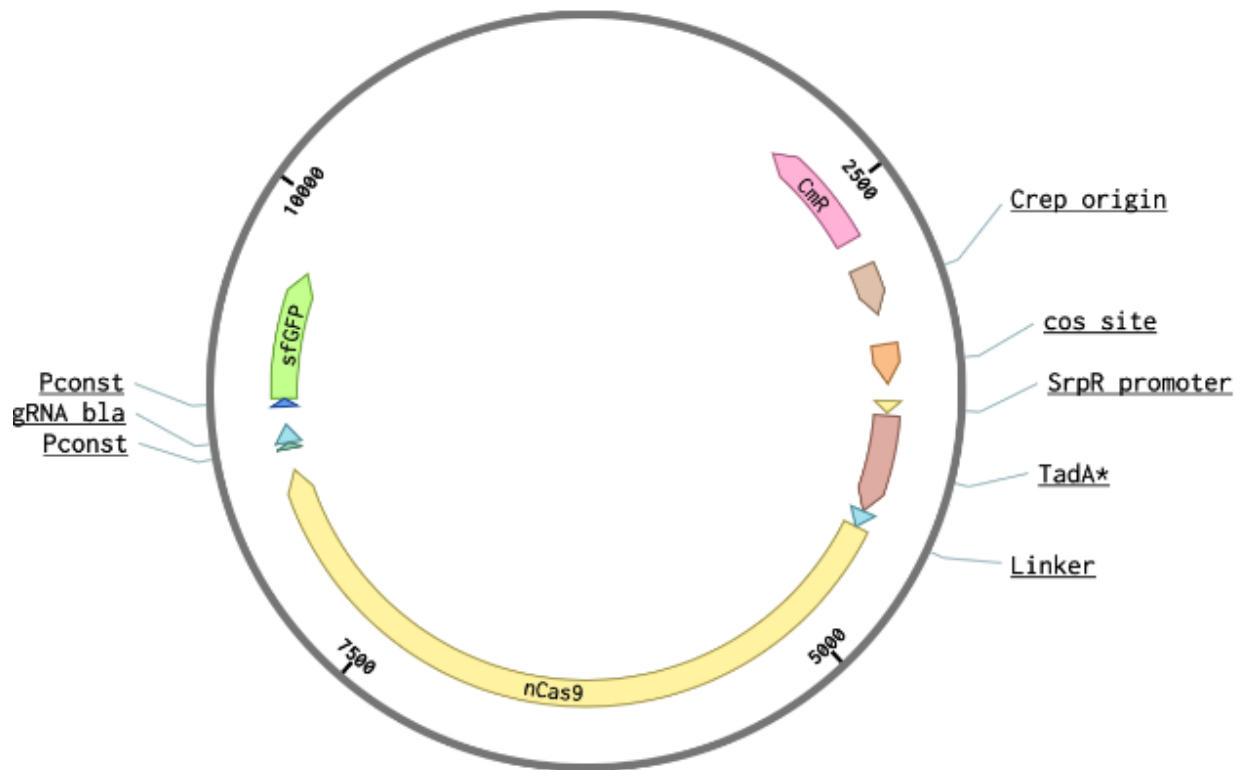

**Figure S7: Plasmid map of the non-replicative cosmid encoding the adenine base editor and a guide RNA targeting the active site of  $\beta$ -lactamase (*bla*).** Packaging into  $\lambda$  phage particles is enabled by the cohesive end site (*cos*) of the  $\lambda$  genome. The adenine base editor is a fusion gene of *TadA\** and *nCas9* under the *SrpR* promoter. The guide RNA targeting the *bla* gene is under a constitutive promoter. The plasmid carries a constitutively-expressed chloramphenicol resistance gene (*CmR*) and the non-replicative primase origin of replication (*Crep*). In addition, the plasmid carries the *sfGFP* gene under a constitutive promoter to investigate cosmid delivery efficiencies. The total plasmid size is 10,747 bp.

**Table S1: Genotypes of *E. coli* strains used in this study.**

| Strain                 | Genotype                                                                                                                | Supplier               |
|------------------------|-------------------------------------------------------------------------------------------------------------------------|------------------------|
| DH10B                  | <i>F- mcrA Δ(mrr-hsdRMS-mcrBC) φ80lacZΔM15 ΔlacX74 recA1 endA1 araD139 Δ (ara-leu)7697 galU galk λ- rpsL(StrR) nupG</i> | Thermo Scientific      |
| CY2120                 | <i>BW25113 Δ9 λcl857 PaPa Sam7 Δcos lamB-</i>                                                                           | University of Illinois |
| CY-1A2                 | <i>BW25113 Δ9 λcl857 Sam7 Δcos gpJ-1A2 Δstf lacZ::SrpR lamB-</i>                                                        | This study             |
| CY-A8                  | <i>BW25113 Δ9 λcl857 Sam7 Δcos gpJ-A8 Δstf lacZ::SrpR lamB- ΔOmpC</i>                                                   | This study             |
| CY-Ur-λ                | <i>BW25113 Δ9 λcl857 orf401::orf314 Sam7 Δcos lamB-</i>                                                                 | This study             |
| MG1655                 | <i>K-12 F- λ- ilvG- rfb-50 rph-1</i>                                                                                    | Pasteur Institute      |
| MG1655-ΔLamB           | <i>K-12 F- λ- ilvG- rfb-50 rph-1 ΔLamB</i>                                                                              | This study             |
| MG1655-ΔLamB-ΔompC     | <i>K-12 F- λ- ilvG- rfb-50 rph-1 ΔLamB ΔompC</i>                                                                        | This study             |
| MG1655- <i>mCherry</i> | <i>K-12 F- λ- ilvG- rfb-50 rph-1 mCherry</i>                                                                            | Pasteur Institute      |
| MG1655- <i>bla</i>     | <i>K-12 F- λ- ilvG- rfb-50 rph-1 rpsLK42R wbbL::bla-rfp</i>                                                             | This study             |
| s14269                 | <i>K-12 F- λ- ilvG- rfb-50 rph-1 rpsLK42R ompC-EDL933</i>                                                               | This study             |
| s14269- <i>bla</i>     | <i>K-12 F- λ- ilvG- rfb-50 rph-1 rpsLK42R wbbL::bla-rfp ompC-EDL933</i>                                                 | This study             |
| s21052                 | <i>K-12 F- λ- ilvG- rfb-50 rph-1 rpsLK42R wbbL::bla-rfp ompC-EDL933 rpsIK42R</i>                                        | This study             |
| <i>E. coli</i> CFT073  | <i>O6:K2:H1</i>                                                                                                         | Pasteur Institute      |



**Table S2: List of plasmids used in this study.**

| Name  | Plasmid                                        | Class       | Resistance | Source     | Notes                                                                    |
|-------|------------------------------------------------|-------------|------------|------------|--------------------------------------------------------------------------|
| p2325 | p15A-cos-pSrpR-RBS-ABE8e gRNA1 (mCherry)       | Cosmid      | CamR       | This study | Encodes ABE targeting mCherry in a constitutive origin of replication    |
| p2326 | p15A-cos-pSrpR-RBS-CBE gRNA2 (mCherry)         | Cosmid      | CamR       | This study | Encodes CBE targeting mCherry in a constitutive origin of replication    |
| p1396 | p15A-cos-pSrpR-RBS-ABE8e gRNA4 ( <i>bla</i> )  | Cosmid      | CamR       | This study | Encodes ABE targeting <i>bla</i> in a constitutive origin of replication |
| p2327 | p15A-cos-pSrpR-RBS-CBE gRNA5 ( <i>bla</i> )    | Cosmid      | CamR       | This study | Encodes CBE targeting <i>bla</i> in a constitutive origin of replication |
| p2328 | pCrep-cos-pSrpR-RBS-ABE8e gRNA4 ( <i>bla</i> ) | Cosmid      | CamR       | This study | Encodes ABE targeting <i>bla</i> in a conditional origin of replication  |
| p1324 | pCrep-cos-sfGFP                                | Cosmid      | CamR       | This study | Encodes sfGFP in a conditional origin of replication                     |
| p513  | p15A-cos-sfGFP                                 | Cosmid      | CamR       | This study | Encodes sfGFP in a constitutive origin of replication                    |
| p938  | pSC101-pPhlF-RBS-stf P2                        | Stf         | KanR       | This study | Encodes an inducible $\lambda$ -P2 STF chimera                           |
| p1471 | pEco-OmpC MG1655 G1                            | Receptor    | KanR       | This study | Encodes OmpC from MG1655                                                 |
| p1472 | pEco-OmpC G17                                  | Receptor    | KanR       | This study | Encodes OmpC from EDL933                                                 |
| p2076 | pIncW-RARE7-RBS-primase                        | Crep system | TpR        | This study | Encodes a constitutive primase gene                                      |
| p1321 | pSC101-pPhlF-RBS-primase                       | Crep system | KanR       | This study | Encodes an inducible primase gene                                        |

**Table S3: List of gRNAs used in this study.**

| Name  | Editor | gRNA                  | Position   | Target                            |
|-------|--------|-----------------------|------------|-----------------------------------|
| gRNA1 | ABE    | CGTACATAAAATTGCGGGCTC | 4A, 6A, 8A | mCherry (M71T, Y72H)              |
| gRNA2 | CBE    | CACTCAGGACTCCTCCCTGC  | 5C         | mCherry (Q114*)                   |
| gRNA3 | CBE    | TAGAACCGTACATAAAATTGC | 6C, 7C     | mCherry (G73N or G73D)            |
| gRNA4 | ABE    | ACTTTTAAAGTTCTGCTATG  | 1A, 7A, 8A | $\beta$ -lactamase (K71E or K71R) |
| gRNA5 | CBE    | GATCAGTTGGGAGCCCGTGT  | 4C         | $\beta$ -lactamase (Q37*)         |

**Table S4: Selection of oligonucleotides used for plasmid sequencing and ddPCR.** Probes P1 and P2 contained a different fluorophore (FAM or HEX), as well as carefully positioned Locked Nucleic Acid bases (LNA; symbolized by the base A, T, C, or G preceded by a “+” sign in the sequences above).

| Name | Oligonucleotide sequence    | Gene                        |
|------|-----------------------------|-----------------------------|
| F1   | ATGGTTTCCAAGGGCGAGG         | mCherry                     |
| R1   | TTATTGTACAGCTCATCCATGCC     | mCherry                     |
| F2   | ATGAGTATTCAACATTTCCGTGTCGC  | <i>Bla</i>                  |
| R2   | TTACCAATGCTTAATCAGTGATGC    | <i>Bla</i>                  |
| F3   | GGATCTCAACAGCGGTAAG         | <i>Bla</i> (ddPCR, primer)  |
| R3   | GGCATCAACACGGGATAATA        | <i>Bla</i> (ddPCR, primer)  |
| P1   | FAM-CT+TT+T+A+AA+GTT+C+T+GC | <i>Bla</i> (ddPCR, probe 1) |
| P2   | HEX-CT+TT+T+G+AAGTT+CT+GC   | <i>Bla</i> (ddPCR, probe 2) |
